# Supplementary material
Source: PubMed Central journal article supplement (PMC6005110)
Supplement: 17-0961r1_hershman_supp_mat_102617_djx259.pdf [file 17-0961r1_hershman_supp_mat_102617_djx259.pdf]

**SUPPLEMENTARY MATERIALS**

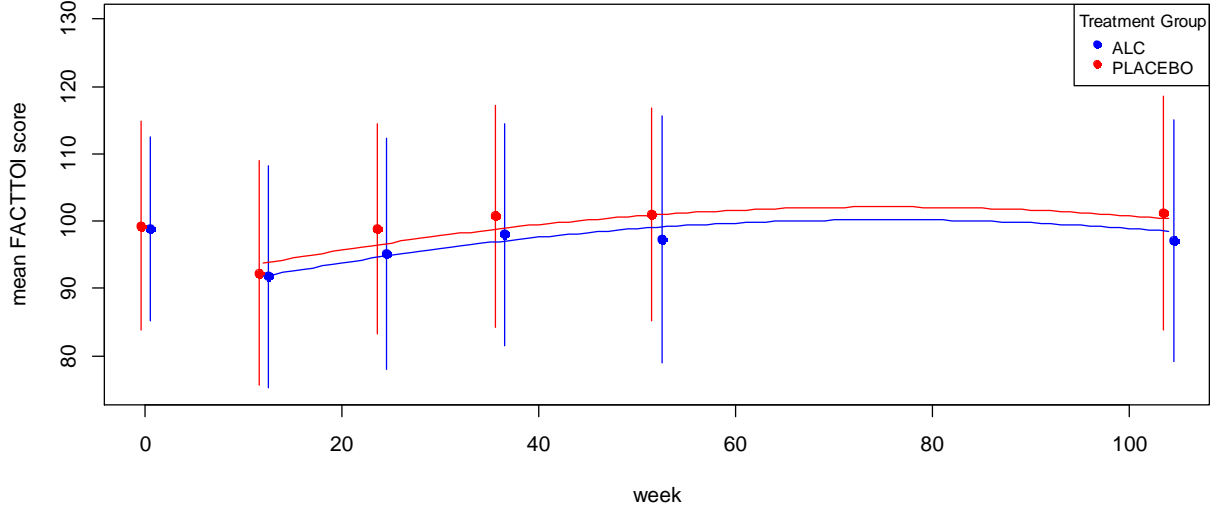

**Supplementary Figure 1: Observed and model-fitted mean FACT-TOI Score over time among participants randomized to Acetyl-L-Carnitine (ALC) and placebo.** Points represent observed mean values at each time, with standard deviation bars Lines represent the fitted values based on linear mixed model results.

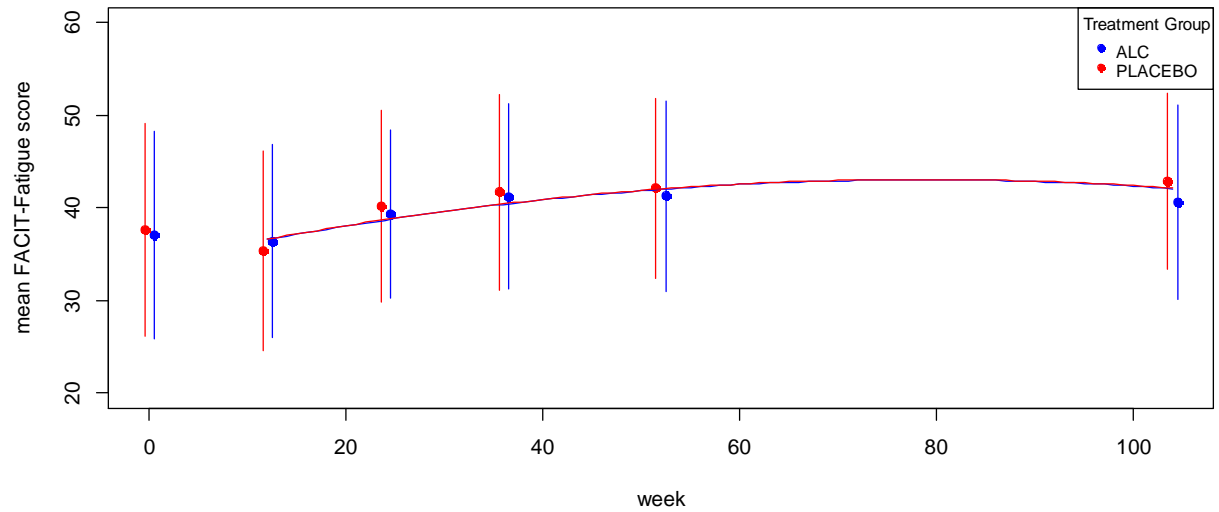

**Supplementary Figure 2: Observed and model-fitted mean FACIT-Fatigue Score over time among participants randomized to Acetyl-L-Carnitine (ALC) and placebo.** Points represent observed mean values at each time, with standard deviation bars. Lines represent the fitted values based on linear mixed model results.

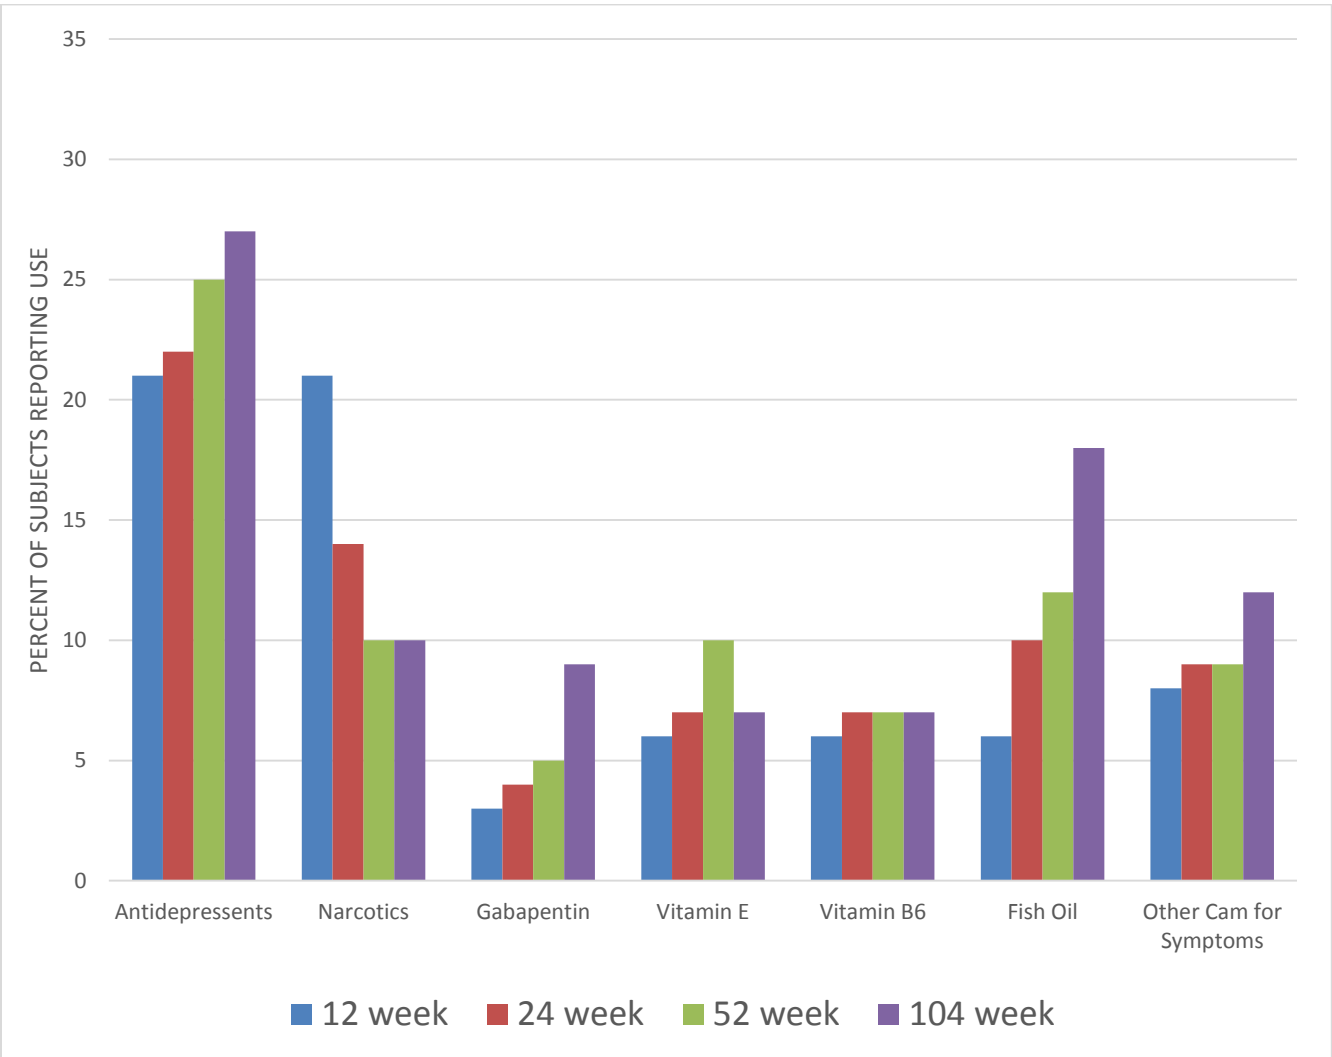

**Supplementary Figure 3: Medication, supplement and complementary alternative medicine (CAM) use in the whole cohort over time. At 12 weeks N=374, at 24 weeks N=356, at 52 weeks N=350, and at 104 weeks N=327.**
